# Supplementary material for: Isofunctional Protein Subfamily Detection Using Data Integration and Spectral Clustering
Source: PubMed Central journal article supplement (PMC4922564; doi:10.1371/journal.pcbi.1005001), 2016-06-27
Supplement: pcbi.1005001.s013.pdf [file pcbi.1005001.s013.pdf]

# Isofunctional Protein Subfamily Detection using Data Integration and Spectral Clustering

Elisa Boari de Lima<sup>1,2,\*</sup>, Wagner Meira Júnior<sup>2</sup>, Raquel Cardoso de Melo-Minardi<sup>2</sup>

**1 Department of Biochemistry and Immunology, Federal University of Minas Gerais, Belo Horizonte, MG, Brazil**

**2 Department of Computer Science, Federal University of Minas Gerais, Belo Horizonte, MG, Brazil**

\* [eblima@dcc.ufmg.br](mailto:eblima@dcc.ufmg.br)

## **S13 Text: Analysis of the species distribution among clusters**

In this Supplementary Text we perform a brief analysis of the distribution of species of origin among the clusters. We consider our most extreme subdivision case, namely the scattering of trypsin-labeled proteins when clustering the serine proteases into twelve clusters. Table S13.1 presents the amount of trypsin-labeled proteins [1] from each species in each cluster.

**Table S13.1.** Species distribution for the trypsin-labeled proteins when dividing the serine proteases into twelve clusters.

| Cluster | Amount | Kingdom  | Phylum     | Class          | Order             | Family          | Genus         | Species             |
|---------|--------|----------|------------|----------------|-------------------|-----------------|---------------|---------------------|
| II      | 1      | animalia | arthropoda | insecta        | lepidoptera       | bombycidae      | bombyx        | b. mori             |
| II      | 1      | animalia | arthropoda | insecta        | lepidoptera       | crambidae       | ostrinia      | o. furnacalis       |
| II      | 6      | animalia | arthropoda | insecta        | lepidoptera       | crambidae       | ostrinia      | o. nubilalis        |
| II      | 7      | animalia | arthropoda | insecta        | lepidoptera       | noctuidae       | helicoverpa   | h. armigera         |
| II      | 1      | animalia | arthropoda | insecta        | lepidoptera       | noctuidae       | heliopsis     | h. virescens        |
| II      | 1      | animalia | arthropoda | insecta        | lepidoptera       | noctuidae       | lacaenobia    | l. oleracea         |
| II      | 6      | animalia | arthropoda | insecta        | lepidoptera       | noctuidae       | sesamia       | s. nonagrioides     |
| II      | 1      | animalia | arthropoda | insecta        | lepidoptera       | pyralidae       | galleria      | g. mellonella       |
| II      | 3      | animalia | arthropoda | insecta        | lepidoptera       | pyralidae       | plodia        | p. interpunctella   |
| II      | 3      | animalia | arthropoda | insecta        | lepidoptera       | sphingidae      | manduca       | m. sexta            |
| II      | 2      | animalia | arthropoda | insecta        | lepidoptera       | tortricidae     | choristoneura | c. fumiferana       |
| IV      | 1      | animalia | chordata   | actinopterygii | acipenseriformes  | acipenseridae   | acipenser     | a. transmontanus    |
| IV      | 1      | animalia | chordata   | actinopterygii | cypriniformes     | cyprinidae      | danio         | d. rerio            |
| IV      | 2      | animalia | chordata   | actinopterygii | salmoniformes     | salmonidae      | oncorhynchus  | o. mykiss           |
| IV      | 2      | animalia | chordata   | actinopterygii | tetraodontiformes | tetraodontidae  | takifugu      | t. rubripes         |
| IV      | 4      | animalia | chordata   | actinopterygii | tetraodontiformes | tetraodontidae  | tetraodon     | t. nigroviridis     |
| IV      | 3      | animalia | chordata   | amphibia       | anura             | pipidae         | xenopus       | x. laevis           |
| IV      | 1      | animalia | chordata   | amphibia       | anura             | pipidae         | xenopus       | x. tropicalis       |
| IV      | 1      | animalia | chordata   | amphibia       | caudata           | salamandridae   | cynops        | c. pyrrhogaster     |
| IV      | 1      | animalia | chordata   | aves           | galliformes       | phasianidae     | gallus        | g. gallus           |
| IV      | 1      | animalia | chordata   | aves           | struthioniformes  | struthionidae   | struthio      | s. camelus          |
| IV      | 3      | animalia | chordata   | mammalia       | artiodactyla      | suidae          | sus           | s. scrofa           |
| IV      | 2      | animalia | chordata   | mammalia       | carnivora         | canidae         | canis         | c. lupus familiaris |
| IV      | 3      | animalia | chordata   | mammalia       | cetartiodactyla   | bovidae         | bos           | b. taurus           |
| IV      | 3      | animalia | chordata   | mammalia       | lagomorpha        | leporidae       | oryctolagus   | o. cuniculus        |
| IV      | 1      | animalia | chordata   | mammalia       | primates          | cercopithecidae | macaca        | m. mulatta          |
| IV      | 3      | animalia | chordata   | mammalia       | primates          | hominidae       | homo          | h. sapiens          |
| IV      | 1      | animalia | chordata   | mammalia       | primates          | hominidae       | pongo         | p. abelii           |
| IV      | 5      | animalia | chordata   | mammalia       | rodentia          | muridae         | mus           | m. musculus         |
| IV      | 4      | animalia | chordata   | mammalia       | rodentia          | muridae         | rattus        | r. norvegicus       |
| IV      | 1      | animalia | chordata   | myxini         | myxiniiformes     | myxiniidae      | eptatretus    | e. stoutii          |
| IV      | 1      | animalia | chordata   | reptilia       | squamata          | gekkonidae      | gekko         | g. gekko            |
| IV      | 1      | animalia | cnidaria   | anthozoa       | actinaria         | edwardsiidae    | nematostella  | n. vectensis        |
| V       | 1      | animalia | chordata   | mammalia       | artiodactyla      | bovidae         | ovis          | o. aries            |
| V       | 2      | animalia | chordata   | mammalia       | carnivora         | canidae         | canis         | c. lupus familiaris |
| V       | 2      | animalia | chordata   | mammalia       | cetartiodactyla   | bovidae         | bos           | b. taurus           |
| V       | 3      | animalia | chordata   | mammalia       | eulipotyphla      | soricidae       | blarina       | b. brevicauda       |
| V       | 1      | animalia | chordata   | mammalia       | perissodactyla    | equidae         | equus         | e. ferus caballus   |
| V       | 1      | animalia | chordata   | mammalia       | primates          | cercopithecidae | cercopithecus | c. cephus           |
| V       | 1      | animalia | chordata   | mammalia       | primates          | cercopithecidae | erythrocebus  | e. patas            |
| V       | 1      | animalia | chordata   | mammalia       | primates          | cercopithecidae | papio         | p. anubis           |
| V       | 4      | animalia | chordata   | mammalia       | primates          | hominidae       | homo          | h. sapiens          |
| V       | 1      | animalia | chordata   | mammalia       | primates          | hominidae       | pan           | p. paniscus         |

**Table S13.1.** (continuation)

| Cluster | Amount | Kingdom  | Phylum   | Class          | Order             | Family            | Genus           | Species               |
|---------|--------|----------|----------|----------------|-------------------|-------------------|-----------------|-----------------------|
| V       | 1      | animalia | chordata | mammalia       | primates          | hominidae         | pan             | p. troglodytes        |
| V       | 1      | animalia | chordata | mammalia       | primates          | hominidae         | pongo           | p. pygmaeus           |
| V       | 10     | animalia | chordata | mammalia       | rodentia          | muridae           | mus             | m. musculus           |
| V       | 1      | animalia | chordata | mammalia       | rodentia          | muridae           | praomys         | p. natalensis         |
| V       | 8      | animalia | chordata | mammalia       | rodentia          | muridae           | rattus          | r. norvegicus         |
| VI      | 9      | animalia | chordata | actinopterygii | cypriniformes     | cyprinidae        | danio           | d. rerio              |
| VI      | 3      | animalia | chordata | actinopterygii | tetraodontiformes | tetraodontidae    | takifugu        | t. rubripes           |
| VI      | 3      | animalia | chordata | actinopterygii | tetraodontiformes | tetraodontidae    | tetraodon       | t. nigroviridis       |
| VI      | 2      | animalia | chordata | amphibia       | anura             | pipidae           | xenopodinae     | x. laevis             |
| VI      | 2      | animalia | chordata | amphibia       | anura             | pipidae           | xenopodinae     | x. tropicalis         |
| VI      | 2      | animalia | chordata | aves           | galliformes       | phasianidae       | gallus          | g. gallus             |
| VI      | 1      | animalia | chordata | mammalia       | artiodactyla      | bovidae           | ovis            | o. aries              |
| VI      | 2      | animalia | chordata | mammalia       | artiodactyla      | suidae            | sus             | s. scrofa             |
| VI      | 1      | animalia | chordata | mammalia       | carnivora         | canidae           | canis           | c. lupus familiaris   |
| VI      | 1      | animalia | chordata | mammalia       | carnivora         | felidae           | felis           | f. silvestris catus   |
| VI      | 4      | animalia | chordata | mammalia       | cetartiodactyla   | bovidae           | bos             | b. taurus             |
| VI      | 2      | animalia | chordata | mammalia       | lagomorpha        | leporidae         | oryctolagus     | o. cuniculus          |
| VI      | 1      | animalia | chordata | mammalia       | monotremata       | ornithorhynchidae | ornithorhynchus | o. anatinus           |
| VI      | 2      | animalia | chordata | mammalia       | primates          | cercopitheciidae  | macaca          | m. mulatta            |
| VI      | 3      | animalia | chordata | mammalia       | primates          | hominidae         | homo            | h. sapiens            |
| VI      | 2      | animalia | chordata | mammalia       | primates          | hominidae         | pan             | p. troglodytes        |
| VI      | 1      | animalia | chordata | mammalia       | rodentia          | caviidae          | cavia           | c. porcellus          |
| VI      | 7      | animalia | chordata | mammalia       | rodentia          | muridae           | mus             | m. musculus           |
| VI      | 2      | animalia | chordata | mammalia       | rodentia          | muridae           | rattus          | r. norvegicus         |
| VI      | 1      | animalia | chordata | reptilia       | squamata          | elapidae          | notechis        | n. scutatus           |
| VI      | 1      | animalia | chordata | reptilia       | squamata          | elapidae          | oxyuranus       | o. microlepidotus     |
| VI      | 1      | animalia | chordata | reptilia       | squamata          | elapidae          | oxyuranus       | o. scutellatus        |
| VI      | 1      | animalia | chordata | reptilia       | squamata          | elapidae          | pseudechis      | p. porphyriacus       |
| VI      | 3      | animalia | chordata | reptilia       | squamata          | elapidae          | pseudonaja      | p. textilis           |
| VI      | 1      | animalia | chordata | reptilia       | squamata          | elapidae          | pseudonaja      | p. textilis textilis  |
| VI      | 2      | animalia | chordata | reptilia       | squamata          | elapidae          | tropidechis     | t. carinatus          |
| VII     | 1      | animalia | chordata | amphibia       | anura             | pipidae           | xenopodinae     | x. laevis             |
| VII     | 19     | animalia | chordata | mammalia       | primates          | hominidae         | homo            | h. sapiens            |
| VII     | 11     | animalia | chordata | mammalia       | rodentia          | muridae           | mus             | m. musculus           |
| VII     | 1      | animalia | chordata | reptilia       | squamata          | colubridae        | philodryas      | p. olfersii           |
| VII     | 1      | animalia | chordata | reptilia       | squamata          | elapidae          | hydrophis       | h. hardwickii         |
| VII     | 7      | animalia | chordata | reptilia       | squamata          | viperidae         | agkistrodon     | a. acutus             |
| VII     | 1      | animalia | chordata | reptilia       | squamata          | viperidae         | agkistrodon     | a. bilineatus         |
| VII     | 1      | animalia | chordata | reptilia       | squamata          | viperidae         | agkistrodon     | a. caliginosus        |
| VII     | 2      | animalia | chordata | reptilia       | squamata          | viperidae         | agkistrodon     | a. contortrix         |
| VII     | 2      | animalia | chordata | reptilia       | squamata          | viperidae         | agkistrodon     | a. halys blomhoffi    |
| VII     | 1      | animalia | chordata | reptilia       | squamata          | viperidae         | agkistrodon     | a. halys breviceaudus |
| VII     | 7      | animalia | chordata | reptilia       | squamata          | viperidae         | agkistrodon     | a. halys pallas       |

**Table S13.1.** (continuation)

| Cluster | Amount | Kingdom  | Phylum     | Class          | Order             | Family            | Genus            | Species                |
|---------|--------|----------|------------|----------------|-------------------|-------------------|------------------|------------------------|
| VII     | 1      | animalia | chordata   | reptilia       | squamata          | viperidae         | agkistrodon      | a. rhodostoma          |
| VII     | 1      | animalia | chordata   | reptilia       | squamata          | viperidae         | bothrops         | b. insularis           |
| VII     | 4      | animalia | chordata   | reptilia       | squamata          | viperidae         | bothrops         | b. jararaca            |
| VII     | 1      | animalia | chordata   | reptilia       | squamata          | viperidae         | crotalus         | c. atrox               |
| VII     | 1      | animalia | chordata   | reptilia       | squamata          | viperidae         | crotalus         | c. durissus durissus   |
| VII     | 1      | animalia | chordata   | reptilia       | squamata          | viperidae         | crotalus         | c. durissus terrificus |
| VII     | 9      | animalia | chordata   | reptilia       | squamata          | viperidae         | deinagkistrodon  | d. acutus              |
| VII     | 1      | animalia | chordata   | reptilia       | squamata          | viperidae         | gloydius         | g. saxatilis           |
| VII     | 1      | animalia | chordata   | reptilia       | squamata          | viperidae         | gloydius         | g. shedaensis          |
| VII     | 4      | animalia | chordata   | reptilia       | squamata          | viperidae         | gloydius         | g. ussuriensis         |
| VII     | 1      | animalia | chordata   | reptilia       | squamata          | viperidae         | lachesis         | l. muta muta           |
| VII     | 1      | animalia | chordata   | reptilia       | squamata          | viperidae         | lachesis         | l. stenophrys          |
| VII     | 2      | animalia | chordata   | reptilia       | squamata          | viperidae         | protobothrops    | p. elegans             |
| VII     | 1      | animalia | chordata   | reptilia       | squamata          | viperidae         | rhinocerophis    | r. alternatus          |
| VII     | 2      | animalia | chordata   | reptilia       | squamata          | viperidae         | trimeresurus     | t. albolabris          |
| VII     | 2      | animalia | chordata   | reptilia       | squamata          | viperidae         | trimeresurus     | t. flavoviridis        |
| VII     | 2      | animalia | chordata   | reptilia       | squamata          | viperidae         | trimeresurus     | t. gramineus           |
| VII     | 2      | animalia | chordata   | reptilia       | squamata          | viperidae         | trimeresurus     | t. jerdoni             |
| VII     | 2      | animalia | chordata   | reptilia       | squamata          | viperidae         | trimeresurus     | t. mucrosquamatus      |
| VII     | 12     | animalia | chordata   | reptilia       | squamata          | viperidae         | trimeresurus     | t. stejnegeri          |
| VII     | 1      | animalia | chordata   | reptilia       | squamata          | viperidae         | vipera           | v. lebetina            |
| VII     | 5      | animalia | chordata   | reptilia       | squamata          | viperidae         | vindovipera      | v. stejnegeri          |
| VIII    | 1      | animalia | arthropoda | arachnida      | ixodida           | ixodidae          | ixodes           | i. scapularis          |
| VIII    | 1      | animalia | arthropoda | insecta        | coleoptera        | chrysomelidae     | phaedon          | p. cochleariae         |
| VIII    | 1      | animalia | arthropoda | insecta        | coleoptera        | scarabaeidae      | holotrichia      | h. diomphalia          |
| VIII    | 1      | animalia | arthropoda | insecta        | diptera           | cecidomyiidae     | mayetiola        | m. destructor          |
| VIII    | 19     | animalia | arthropoda | insecta        | diptera           | culicidae         | aedes            | a. aegypti             |
| VIII    | 5      | animalia | arthropoda | insecta        | diptera           | culicidae         | anopheles        | a. gambiae             |
| VIII    | 1      | animalia | arthropoda | insecta        | diptera           | culicidae         | anopheles        | a. gambiae str         |
| VIII    | 12     | animalia | arthropoda | insecta        | diptera           | drosophilidae     | drosophila       | d. melanogaster        |
| VIII    | 5      | animalia | arthropoda | insecta        | diptera           | drosophilidae     | drosophila       | d. pseudoobscura       |
| VIII    | 1      | animalia | arthropoda | insecta        | diptera           | psychodidae       | phlebotomus      | p. ariasi              |
| VIII    | 1      | animalia | arthropoda | insecta        | lepidoptera       | bombycidae        | bombyx           | b. mandarina           |
| VIII    | 2      | animalia | arthropoda | insecta        | lepidoptera       | bombycidae        | bombyx           | b. mori                |
| VIII    | 2      | animalia | arthropoda | insecta        | lepidoptera       | sphingidae        | manduca          | m. sexta               |
| VIII    | 2      | animalia | arthropoda | insecta        | siphonaptera      | pulicidae         | ctenoccephalides | c. felis               |
| VIII    | 1      | animalia | arthropoda | malacostraca   | decapoda          | nephropidae       | homarus          | h. americanus          |
| VIII    | 4      | animalia | chordata   | actinopterygii | beloniformes      | adrianiichthyidae | oryzias          | o. latipes             |
| VIII    | 8      | animalia | chordata   | actinopterygii | cypriniformes     | cyprinidae        | danio            | d. rerio               |
| VIII    | 1      | animalia | chordata   | actinopterygii | salmoniformes     | salmonidae        | oncorhynchus     | o. mykiss              |
| VIII    | 1      | animalia | chordata   | actinopterygii | salmoniformes     | salmonidae        | salvelinus       | s. fontinalis          |
| VIII    | 2      | animalia | chordata   | actinopterygii | tetraodontiformes | tetraodontidae    | tetraodon        | t. nigroviridis        |
| VIII    | 1      | animalia | chordata   | amphibia       | anura             | pipidae           | xenopodinae      | x. laevis              |
| VIII    | 2      | animalia | chordata   | amphibia       | anura             | pipidae           | xenopodinae      | x. tropicalis          |

**Table S13.1.** (continuation)

| Cluster | Amount | Kingdom        | Phylum           | Class               | Order             | Family          | Genus           | Species             |
|---------|--------|----------------|------------------|---------------------|-------------------|-----------------|-----------------|---------------------|
| VIII    | 2      | animalia       | chordata         | ascidiacea          | enterogona        | cionidae        | ciona           | c. intestinalis     |
| VIII    | 1      | animalia       | chordata         | aves                | galliformes       | numididae       | numida          | n. meleagris        |
| VIII    | 1      | animalia       | chordata         | aves                | galliformes       | phasianidae     | meleagris       | m. gallopavo        |
| VIII    | 2      | animalia       | chordata         | mammalia            | artiodactyla      | bovidae         | ovis            | o. aries            |
| VIII    | 3      | animalia       | chordata         | mammalia            | artiodactyla      | suidae          | sus             | s. scrofa           |
| VIII    | 2      | animalia       | chordata         | mammalia            | carnivora         | canidae         | canis           | c. lupus familiaris |
| VIII    | 7      | animalia       | chordata         | mammalia            | cetartiodactyla   | bovidae         | bos             | b. taurus           |
| VIII    | 1      | animalia       | chordata         | mammalia            | diprotodontia     | macropodidae    | macropus        | m. eugenii          |
| VIII    | 1      | animalia       | chordata         | mammalia            | eulipotyphla      | erinaceidae     | erinaceus       | e. europaeus        |
| VIII    | 1      | animalia       | chordata         | mammalia            | lagomorpha        | leporidae       | oryctolagus     | o. cuniculus        |
| VIII    | 2      | animalia       | chordata         | mammalia            | perissodactyla    | equidae         | equus           | e. ferus caballus   |
| VIII    | 2      | animalia       | chordata         | mammalia            | primates          | cercopithecidae | macaca          | m. fascicularis     |
| VIII    | 1      | animalia       | chordata         | mammalia            | primates          | cercopithecidae | macaca          | m. mulatta          |
| VIII    | 1      | animalia       | chordata         | mammalia            | primates          | cercopithecidae | papio           | p. hamadryas        |
| VIII    | 3      | animalia       | chordata         | mammalia            | primates          | hominidae       | gorilla         | g. gorilla          |
| VIII    | 1      | animalia       | chordata         | mammalia            | primates          | hominidae       | pan             | p. troglodytes      |
| VIII    | 5      | animalia       | chordata         | mammalia            | primates          | hominidae       | pongo           | p. abelii           |
| VIII    | 1      | animalia       | chordata         | mammalia            | rodentia          | caviidae        | cavia           | c. porcellus        |
| VIII    | 1      | animalia       | chordata         | mammalia            | rodentia          | muridae         | meriones        | m. unguiculatus     |
| VIII    | 5      | animalia       | chordata         | mammalia            | rodentia          | muridae         | rattus          | r. norvegicus       |
| VIII    | 1      | animalia       | chordata         | myxini              | myxiniiformes     | myxiniidae      | eptatretus      | e. burgeri          |
| VIII    | 1      | animalia       | chordata         | reptilia            | squamata          | viperidae       | agkistrodon     | a. acutus           |
| VIII    | 1      | animalia       | chordata         | reptilia            | squamata          | viperidae       | bothrops        | b. jararacussu      |
| VIII    | 1      | animalia       | chordata         | reptilia            | squamata          | viperidae       | deinagkistrodon | d. acutus           |
| VIII    | 3      | animalia       | cnidaria         | anthozoa            | actiniaria        | edwardsiidae    | nematostella    | n. vectensis        |
| VIII    | 1      | animalia       | nematoda         | chromadorea         | rhabditida        | rhabditidae     | caenorhabditis  | c. elegans          |
| VIII    | 1      | bacteria       | chloroflexi      | chloroflexi         | chloroflexales    | chloroflexaceae | roseiflexus     | roseiflexus sp      |
| VIII    | 2      | bacteria       | cyanobacteria    | synecococcales      | chloroflexales    | synecococaceae  | synecococcus    | synecococcus sp.    |
| VIII    | 1      | bacteria       | proteobacteria   | gammaproteobacteria | alteromonadales   | colwelliaceae   | colwellia       | c. psychreerythraea |
| VIII    | 1      | bacteria       | proteobacteria   | gammaproteobacteria | oceanospirillales | habellaceae     | habella         | h. chejuensis       |
| VIII    | 1      | chromalveolata | heterokontophyta | oomycetes           | saprolegniales    | leptolegniaceae | aphanomyces     | a. astaci           |
| IX      | 1      | animalia       | arthropoda       | insecta             | diptera           | calliphoridae   | lucilia         | l. cuprina          |
| IX      | 2      | animalia       | arthropoda       | insecta             | diptera           | culicidae       | aedes           | a. aegypti          |
| IX      | 5      | animalia       | arthropoda       | insecta             | diptera           | culicidae       | anopheles       | a. gambiae          |
| IX      | 10     | animalia       | arthropoda       | insecta             | diptera           | dirosophiidae   | drosophila      | d. melanogaster     |
| IX      | 2      | animalia       | arthropoda       | insecta             | diptera           | drosophiidae    | drosophila      | d. pseudoobscura    |
| IX      | 1      | animalia       | arthropoda       | insecta             | diptera           | glossinidae     | glossina        | g. morsitans        |
| IX      | 2      | animalia       | arthropoda       | insecta             | diptera           | oestridae       | hypoderma       | h. lineatum         |
| IX      | 1      | animalia       | arthropoda       | insecta             | lepidoptera       | noctuidae       | agrotis         | a. ipsilon          |
| IX      | 1      | animalia       | chordata         | actinopterygii      | cypriniformes     | cyprinidae      | cyprinus        | c. carpio           |
| IX      | 13     | animalia       | chordata         | actinopterygii      | cypriniformes     | cyprinidae      | danio           | d. rerio            |
| IX      | 1      | animalia       | chordata         | actinopterygii      | gadiformes        | gadidae         | gadus           | g. morhua           |
| IX      | 1      | animalia       | chordata         | actinopterygii      | pleuronectiformes | paralichthyidae | paralichthys    | p. olivaceus        |
| IX      | 4      | animalia       | chordata         | actinopterygii      | tetraodontiformes | tetraodontidae  | tetraodon       | t. nigroviridis     |

**Table S13.1.** (continuation)

| Cluster | Amount | Kingdom  | Phylum         | Class          | Order             | Family               | Genus              | Species             |
|---------|--------|----------|----------------|----------------|-------------------|----------------------|--------------------|---------------------|
| IX      | 5      | animalia | chordata       | amphibia       | anura             | pipidae              | xenopus            | x. laevis           |
| IX      | 3      | animalia | chordata       | amphibia       | anura             | pipidae              | xenopus            | x. tropicalis       |
| IX      | 1      | animalia | chordata       | appendicularia | copelata          | oikopleuridae        | oikopleura         | o. dioica           |
| IX      | 1      | animalia | chordata       | ascidiacea     | stolidobranchia   | styelidae            | polyandrocarpa     | p. misakiensis      |
| IX      | 1      | animalia | chordata       | aves           | anseriformes      | anatidae             | anas               | a. platyrhynchos    |
| IX      | 1      | animalia | chordata       | aves           | galliformes       | phasianidae          | coturnix           | c. coturnix         |
| IX      | 1      | animalia | chordata       | aves           | galliformes       | phasianidae          | meleagris          | m. gallopavo        |
| IX      | 1      | animalia | chordata       | chondrichthyes | carcharhiniformes | trikidae             | triakis            | t. scyllium         |
| IX      | 1      | animalia | chordata       | mammalia       | artiodactyla      | bovidae              | ovis               | o. aries            |
| IX      | 4      | animalia | chordata       | mammalia       | artiodactyla      | suidae               | sus                | s. scrofa           |
| IX      | 1      | animalia | chordata       | mammalia       | carnivora         | canidae              | canis              | c. lupus familiaris |
| IX      | 5      | animalia | chordata       | mammalia       | cetartiodactyla   | bovidae              | bos                | b. taurus           |
| IX      | 4      | animalia | chordata       | mammalia       | chiroptera        | phylostomidae        | desmodus           | d. rotundus         |
| IX      | 2      | animalia | chordata       | mammalia       | lagomorpha        | leporidae            | oryctolagus        | o. cuniculus        |
| IX      | 1      | animalia | chordata       | mammalia       | primates          | callitrichidae       | saguinus           | s. labiatus         |
| IX      | 2      | animalia | chordata       | mammalia       | primates          | cercopithecidae      | macaca             | m. mulatta          |
| IX      | 1      | animalia | chordata       | mammalia       | primates          | cercopithecidae      | papio              | p. cynocephalus     |
| IX      | 1      | animalia | chordata       | mammalia       | primates          | cercopithecidae      | pygathrix          | p. nemaus           |
| IX      | 1      | animalia | chordata       | mammalia       | primates          | cercopithecidae      | rhinopithecus      | r. bieti            |
| IX      | 1      | animalia | chordata       | mammalia       | primates          | cercopithecidae      | trachypithecus     | t. francoisi        |
| IX      | 1      | animalia | chordata       | mammalia       | primates          | cercopithecidae      | trachypithecus     | t. phayrei          |
| IX      | 2      | animalia | chordata       | mammalia       | primates          | hominidae            | gorilla            | g. gorilla          |
| IX      | 28     | animalia | chordata       | mammalia       | primates          | hominidae            | homo               | h. sapiens          |
| IX      | 1      | animalia | chordata       | mammalia       | primates          | hominidae            | pan                | p. paniscus         |
| IX      | 2      | animalia | chordata       | mammalia       | primates          | hominidae            | pan                | p. troglodytes      |
| IX      | 4      | animalia | chordata       | mammalia       | primates          | hominidae            | pongo              | p. abelii           |
| IX      | 1      | animalia | chordata       | mammalia       | primates          | hominidae            | pongo              | p. pygmaeus         |
| IX      | 1      | animalia | chordata       | mammalia       | primates          | hylobatidae          | hoolock            | h. hoolock          |
| IX      | 1      | animalia | chordata       | mammalia       | primates          | hylobatidae          | nomascus           | n. leucogenys       |
| IX      | 1      | animalia | chordata       | mammalia       | primates          | hylobatidae          | symphalangus       | s. syndactylus      |
| IX      | 36     | animalia | chordata       | mammalia       | rodentia          | muridae              | mus                | m. musculus         |
| IX      | 16     | animalia | chordata       | mammalia       | rodentia          | muridae              | rattus             | r. norvegicus       |
| IX      | 1      | animalia | chordata       | mammalia       | rodentia          | muridae              | rattus             | r. rattus           |
| IX      | 7      | animalia | cnidaria       | anthozoa       | actinaria         | edwardsiidae         | nematostella       | n. vectensis        |
| IX      | 1      | animalia | echinodermata  | asteroidea     | valvata           | asterinidae          | patiria            | p. pectinifera      |
| IX      | 1      | animalia | echinodermata  | echinoidea     | echinoidea        | strongylocentrotidae | strongylocentrotus | s. purpuratus       |
| IX      | 1      | animalia | nematoda       | chromadorea    | rhabditida        | rhabditidae          | caenorhabditis     | c. elegans          |
| IX      | 3      | bacteria | actinobacteria | actinobacteria | actinomycetales   | pseudonocardiaceae   | saccharopolyspora  | s. erythraea        |
| IX      | 1      | bacteria | actinobacteria | actinobacteria | actinomycetales   | streptomycetaceae    | streptomyces       | s. griseus          |
| X       | 1      | animalia | arthropoda     | arachnida      | astigmata         | glycyphagidae        | glycyphagus        | g. domesticus       |
| X       | 1      | animalia | arthropoda     | arachnida      | astigmata         | glycyphagidae        | lepidoglyphus      | l. destructor       |
| X       | 1      | animalia | arthropoda     | insecta        | coleoptera        | bostrichidae         | ryzopertha         | r. dominica         |
| X       | 2      | animalia | arthropoda     | insecta        | coleoptera        | lampyridae           | pyrocoelia         | p. rufa             |
| X       | 1      | animalia | arthropoda     | insecta        | siphonaptera      | pulicidae            | ctenoccephalides   | c. felis            |

**Table S13.1.** (continuation)

| Cluster | Amount | Kingdom  | Phylum     | Class          | Order              | Family            | Genus              | Species             |
|---------|--------|----------|------------|----------------|--------------------|-------------------|--------------------|---------------------|
| X       | 16     | animalia | arthropoda | maxillopoda    | siphonostomatoida  | caligidae         | lepeophtheirus     | l. salmonis         |
| X       | 1      | animalia | chordata   | actinopterygii | anguilliformes     | anguillidae       | anguilla           | a. japonica         |
| X       | 1      | animalia | chordata   | actinopterygii | beloniformes       | adrianiichthyidae | oryzias            | o. latipes          |
| X       | 2      | animalia | chordata   | actinopterygii | clupeiformes       | engraulidae       | engraulis          | e. japonicus        |
| X       | 1      | animalia | chordata   | actinopterygii | cypriniformes      | catostomidae      | myxocyprinus       | m. asiaticus        |
| X       | 1      | animalia | chordata   | actinopterygii | cypriniformes      | cyprinidae        | carassius          | c. auratus          |
| X       | 4      | animalia | chordata   | actinopterygii | cypriniformes      | cyprinidae        | danio              | d. rerio            |
| X       | 1      | animalia | chordata   | actinopterygii | perciformes        | carangidae        | seriola            | s. quinqueradiata   |
| X       | 2      | animalia | chordata   | actinopterygii | perciformes        | cichlidae         | oreochromis        | o. aureus           |
| X       | 2      | animalia | chordata   | actinopterygii | perciformes        | cichlidae         | oreochromis        | o. niloticus        |
| X       | 1      | animalia | chordata   | actinopterygii | perciformes        | labridae          | tautoglabrus       | t. adpersus         |
| X       | 5      | animalia | chordata   | actinopterygii | perciformes        | nototheniidae     | dissostichus       | d. mawsoni          |
| X       | 1      | animalia | chordata   | actinopterygii | perciformes        | nototheniidae     | notothenia         | n. coriiceps        |
| X       | 1      | animalia | chordata   | actinopterygii | perciformes        | nototheniidae     | paranotothenia     | p. magellanica      |
| X       | 3      | animalia | chordata   | actinopterygii | perciformes        | sparidae          | sparus             | s. aurata           |
| X       | 4      | animalia | chordata   | actinopterygii | pleuronectiformes  | paralichthyidae   | paralichthys       | p. olivaceus        |
| X       | 1      | animalia | chordata   | actinopterygii | pleuronectiformes  | pleuronectidae    | kareius            | k. bicoloratus      |
| X       | 1      | animalia | chordata   | actinopterygii | pleuronectiformes  | pleuronectidae    | pleuronectes       | p. platessa         |
| X       | 2      | animalia | chordata   | actinopterygii | pleuronectiformes  | pleuronectidae    | pseudopleuronectes | p. americanus       |
| X       | 6      | animalia | chordata   | actinopterygii | pleuronectiformes  | soleidae          | solea              | s. senegalensis     |
| X       | 1      | animalia | chordata   | actinopterygii | salmoniformes      | salmonidae        | oncorhynchus       | o. keta             |
| X       | 3      | animalia | chordata   | actinopterygii | salmoniformes      | salmonidae        | salmo              | s. salar            |
| X       | 1      | animalia | chordata   | actinopterygii | siluriformes       | pangasiidae       | pangasianodon      | p. hypophthalmus    |
| X       | 1      | animalia | chordata   | actinopterygii | tetraodontiformes  | tetraodontidae    | takifugu           | t. rubripes         |
| X       | 2      | animalia | chordata   | actinopterygii | tetraodontiformes  | tetraodontidae    | takifugu           | t. rubripes         |
| X       | 3      | animalia | chordata   | actinopterygii | tetraodontiformes  | tetraodontidae    | tetraodon          | t. nigroviridis     |
| X       | 3      | animalia | chordata   | actinopterygii | gadiformes         | gadidae           | gadus              | g. morhua           |
| X       | 11     | animalia | chordata   | amphibia       | anura              | pipidae           | xenopodinae        | x. laevis           |
| X       | 8      | animalia | chordata   | amphibia       | anura              | pipidae           | xenopodinae        | x. tropicalis       |
| X       | 2      | animalia | chordata   | ascidiacea     | pleurogona         | styelidae         | botryllus          | b. schlosseri       |
| X       | 1      | animalia | chordata   | ascidiacea     | stolidobranchia    | styelidae         | polyandrocarpa     | p. misakiensis      |
| X       | 4      | animalia | chordata   | aves           | galliformes        | phasianidae       | gallus             | g. gallus           |
| X       | 1      | animalia | chordata   | aves           | struthioniformes   | struthionidae     | struthio           | s. camelus          |
| X       | 1      | animalia | chordata   | chondrichthyes | squaliformes       | squalidae         | squalus            | s. acanthias        |
| X       | 4      | animalia | chordata   | hyperoartia    | petromyzontiformes | petromyzontidae   | petromyzon         | p. marinus          |
| X       | 1      | animalia | chordata   | mammalia       | artiodactyla       | suidae            | sus                | s. scrofa           |
| X       | 1      | animalia | chordata   | mammalia       | carnivora          | canidae           | canis              | c. lupus familiaris |
| X       | 2      | animalia | chordata   | mammalia       | carnivora          | canidae           | canis              | c. lupus familiaris |
| X       | 6      | animalia | chordata   | mammalia       | cetartiodactyla    | bovidae           | bos                | b. taurus           |
| X       | 1      | animalia | chordata   | mammalia       | primates           | callitrichidae    | saguinus           | s. oedipus          |
| X       | 7      | animalia | chordata   | mammalia       | primates           | cercopitheciidae  | macaca             | m. mulatta          |
| X       | 23     | animalia | chordata   | mammalia       | primates           | hominidae         | homo               | h. sapiens          |
| X       | 2      | animalia | chordata   | mammalia       | rodentia           | caviidae          | cavia              | c. porcellus        |
| X       | 26     | animalia | chordata   | mammalia       | rodentia           | muridae           | mus                | m. musculus         |

**Table S13.1.** (continuation)

| Cluster | Amount | Kingdom  | Phylum        | Class           | Order          | Family          | Genus            | Species             |
|---------|--------|----------|---------------|-----------------|----------------|-----------------|------------------|---------------------|
| X       | 8      | animalia | chordata      | mammalia        | rodentia       | muridae         | rattus           | r. norvegicus       |
| X       | 5      | animalia | cnidaria      | anthozoa        | actiniaria     | edwardsiidae    | nematostella     | n. vectensis        |
| X       | 1      | animalia | echinodermata | asteroidea      | paxillosida    | luidiidae       | luidia           | l. foliolata        |
| X       | 1      | fungi    | ascomycota    | sordariomycetes | hypocreales    | hypocreaceae    | trichoderma      | t. harzianum        |
| XI      | 2      | animalia | arthropoda    | arachnida       | acariformes    | pyroglyphidae   | dermatophagoides | d. farinae          |
| XI      | 3      | animalia | arthropoda    | arachnida       | acariformes    | pyroglyphidae   | dermatophagoides | d. pteromyssinus    |
| XI      | 1      | animalia | arthropoda    | arachnida       | araneae        | agelenidae      | agelenopsis      | a. aperta           |
| XI      | 1      | animalia | arthropoda    | arachnida       | astigmata      | pyroglyphidae   | euroglyphus      | e. maynei           |
| XI      | 1      | animalia | arthropoda    | arachnida       | ixodida        | ixodidae        | dermacentor      | d. andersoni        |
| XI      | 1      | animalia | arthropoda    | arachnida       | ixodida        | ixodidae        | dermacentor      | d. variabilis       |
| XI      | 1      | animalia | arthropoda    | arachnida       | sarcoptiformes | acaridae        | tyrophagus       | t. putrescentiae    |
| XI      | 1      | animalia | arthropoda    | arachnida       | sarcoptiformes | sarcoptidae     | sarcoptes        | s. scabiei          |
| XI      | 1      | animalia | arthropoda    | insecta         | blattodea      | blattellidae    | blattella        | b. germanica        |
| XI      | 1      | animalia | arthropoda    | insecta         | coleoptera     | curculionidae   | anthonomus       | a. grandis          |
| XI      | 1      | animalia | arthropoda    | insecta         | coleoptera     | curculionidae   | diaprepes        | d. abbreviatus      |
| XI      | 1      | animalia | arthropoda    | insecta         | coleoptera     | enebrionidae    | tenebrio         | t. molitor          |
| XI      | 2      | animalia | arthropoda    | insecta         | coleoptera     | scarabaeidae    | holotrichia      | h. diomphalia       |
| XI      | 3      | animalia | arthropoda    | insecta         | diptera        | ceratopogonidae | culicoides       | c. sonorensis       |
| XI      | 46     | animalia | arthropoda    | insecta         | diptera        | culicidae       | aedes            | a. aegypti          |
| XI      | 2      | animalia | arthropoda    | insecta         | diptera        | culicidae       | anopheles        | a. dirus            |
| XI      | 28     | animalia | arthropoda    | insecta         | diptera        | culicidae       | anopheles        | a. gambiae          |
| XI      | 3      | animalia | arthropoda    | insecta         | diptera        | culicidae       | anopheles        | a. gambiae str      |
| XI      | 1      | animalia | arthropoda    | insecta         | diptera        | culicidae       | culex            | c. quinquefasciatus |
| XI      | 35     | animalia | arthropoda    | insecta         | diptera        | drosophilidae   | drosophila       | d. melanogaster     |
| XI      | 20     | animalia | arthropoda    | insecta         | diptera        | drosophilidae   | drosophila       | d. pseudoobscura    |
| XI      | 1      | animalia | arthropoda    | insecta         | diptera        | psychodidae     | lutzomyia        | l. longipalpis      |
| XI      | 1      | animalia | arthropoda    | insecta         | diptera        | psychodidae     | phlebotomus      | p. papatasi         |
| XI      | 1      | animalia | arthropoda    | insecta         | diptera        | simuliidae      | simulium         | s. vittatum         |
| XI      | 2      | animalia | arthropoda    | insecta         | hemiptera      | delphacidae     | nilaparvata      | n. lugens           |
| XI      | 1      | animalia | arthropoda    | insecta         | hymenoptera    | apidae          | bombus           | b. pensylvanicus    |
| XI      | 1      | animalia | arthropoda    | insecta         | hyphenoptera   | vespidae        | polistes         | p. dominula         |
| XI      | 1      | animalia | arthropoda    | insecta         | lepidoptera    | arctiidae       | hyphantria       | h. cunea            |
| XI      | 3      | animalia | arthropoda    | insecta         | lepidoptera    | bombycidae      | bombyx           | b. mori             |
| XI      | 1      | animalia | arthropoda    | insecta         | lepidoptera    | crambidae       | ostrinia         | o. nubilalis        |
| XI      | 1      | animalia | arthropoda    | insecta         | lepidoptera    | plutellidae     | plutella         | p. xylostella       |
| XI      | 1      | animalia | arthropoda    | insecta         | lepidoptera    | saturniidae     | lonomia          | l. obliqua          |
| XI      | 7      | animalia | arthropoda    | insecta         | lepidoptera    | sphingidae      | manduca          | m. sexta            |
| XI      | 1      | animalia | arthropoda    | insecta         | phthiraptera   | pediculidae     | pediculus        | p. humanus          |
| XI      | 5      | animalia | arthropoda    | insecta         | siphonaptera   | pulicidae       | ctenoccephalides | c. felis            |
| XI      | 1      | animalia | arthropoda    | malacostraca    | decapoda       | astacidae       | astacus          | a. fluviatilis      |
| XI      | 1      | animalia | arthropoda    | malacostraca    | decapoda       | astacidae       | astacus          | a. leptodactylus    |
| XI      | 2      | animalia | arthropoda    | malacostraca    | decapoda       | astacidae       | pacifastacus     | p. leniusculus      |
| XI      | 1      | animalia | arthropoda    | malacostraca    | decapoda       | palimuridae     | panulirus        | p. argus            |
| XI      | 1      | animalia | arthropoda    | malacostraca    | decapoda       | penaeidae       | litopenaeus      | l. vannamei         |



**Table S13.1.** (continuation)

| Cluster | Amount | Kingdom  | Phylum         | Class                | Order             | Family               | Genus              | Species             |
|---------|--------|----------|----------------|----------------------|-------------------|----------------------|--------------------|---------------------|
| XI      | 1      | animalia | arthropoda     | malacostraca         | decapoda          | penaeidae            | penaeus            | p. japonicus        |
| XI      | 3      | animalia | arthropoda     | malacostraca         | decapoda          | penaeidae            | penaeus            | p. vannamei         |
| XI      | 1      | animalia | arthropoda     | malacostraca         | decapoda          | portunidae           | callinectes        | c. sapidus          |
| XI      | 4      | animalia | arthropoda     | merostomata          | xiphosura         | limulidae            | tachypleus         | t. tridentatus      |
| XI      | 1      | animalia | chordata       | actinopterygii       | cypriniformes     | cyprinidae           | cyprinus           | c. carpio           |
| XI      | 7      | animalia | chordata       | actinopterygii       | cypriniformes     | cyprinidae           | danio              | d. rerio            |
| XI      | 1      | animalia | chordata       | actinopterygii       | tetraodontiformes | tetraodontidae       | takifugu           | t. rubripes         |
| XI      | 3      | animalia | chordata       | actinopterygii       | tetraodontiformes | tetraodontidae       | tetraodon          | t. nigroviridis     |
| XI      | 6      | animalia | chordata       | amphibia             | anura             | pipidae              | xenopodinae        | x. laevis           |
| XI      | 2      | animalia | chordata       | amphibia             | anura             | pipidae              | xenopodinae        | x. tropicalis       |
| XI      | 1      | animalia | chordata       | ascidiacea           | pleurogona        | pyuridae             | halocynthia        | h. roretzi          |
| XI      | 1      | animalia | chordata       | ascidiacea           | pleurogona        | pyuridae             | herdmania          | h. momus            |
| XI      | 1      | animalia | chordata       | ascidiacea           | stolidobranchia   | pyuridae             | boltenia           | b. villosa          |
| XI      | 3      | animalia | chordata       | aves                 | galliformes       | phasianidae          | gallus             | g. gallus           |
| XI      | 1      | animalia | chordata       | leptocardii          | amphioxiformes    | branchiostomidae     | branchiostoma      | b. belcheri         |
| XI      | 1      | animalia | chordata       | mammalia             | artiodactyla      | bovidae              | bubalus            | b. bubalis          |
| XI      | 1      | animalia | chordata       | mammalia             | artiodactyla      | bovidae              | ovis               | o. aries            |
| XI      | 1      | animalia | chordata       | mammalia             | artiodactyla      | bovidae              | ovis               | o. aries            |
| XI      | 3      | animalia | chordata       | mammalia             | artiodactyla      | suidae               | sus                | s. scrofa           |
| XI      | 1      | animalia | chordata       | mammalia             | carnivora         | canidae              | canis              | c. lupus familiaris |
| XI      | 4      | animalia | chordata       | mammalia             | cetartiodactyla   | bovidae              | bos                | b. taurus           |
| XI      | 1      | animalia | chordata       | mammalia             | primates          | cercopithecidae      | macaca             | m. mulatta          |
| XI      | 14     | animalia | chordata       | mammalia             | primates          | hominidae            | homo               | h. sapiens          |
| XI      | 1      | animalia | chordata       | mammalia             | primates          | hominidae            | pan                | p. paniscus         |
| XI      | 1      | animalia | chordata       | mammalia             | primates          | hominidae            | pan                | p. troglodytes      |
| XI      | 2      | animalia | chordata       | mammalia             | primates          | hominidae            | pongo              | p. pygmaeus         |
| XI      | 13     | animalia | chordata       | mammalia             | rodentia          | muridae              | mus                | m. musculus         |
| XI      | 3      | animalia | chordata       | mammalia             | rodentia          | muridae              | rattus             | r. norvegicus       |
| XI      | 3      | animalia | cnidaria       | anthozoa             | actiniaria        | edwardsiidae         | nematostella       | n. vectensis        |
| XI      | 1      | animalia | echinodermata  | echinoidea           | echinoidea        | strongylocentrotidae | strongylocentrotus | s. purpuratus       |
| XI      | 1      | animalia | mollusca       | gastropoda           | echinoidea        | lymnaeidae           | radix              | r. peregra          |
| XI      | 1      | animalia | mollusca       | gastropoda           | echinoidea        | planorbidae          | bionppalaria       | b. glabrata         |
| XI      | 3      | animalia | nematoda       | adenophorea          | trichocephalida   | planorbidae          | trichimella        | t. spiralis         |
| XI      | 1      | animalia | porifera       | demospongiae         | verongida         | aplysiniidae         | aplysina           | a. fistularis       |
| XI      | 1      | bacteria | proteobacteria | alphaproteobacteria  | rhodobacterales   | rhodobacteraceae     | roseovarius        | r. nubinhibens      |
| XI      | 1      | bacteria | proteobacteria | delta proteobacteria | myxococcales      | myxococcaceae        | myxococcus         | m. xanthus          |
| XI      | 1      | bacteria | proteobacteria | deltaproteobacteria  | bdellovibrionales | bdellovibrionaceae   | bdellovibrio       | b. bacteriovorus    |
| XI      | 1      | bacteria | proteobacteria | gammaproteobacteria  | alteromonadales   | psychromonadaceae    | psychromonas       | p. ingrahamii       |
| XI      | 1      | bacteria | proteobacteria | gammaproteobacteria  | oceanospirillales | oceanospirillaceae   | bermanella         | b. maristrubri      |
| XI      | 2      | bacteria | proteobacteria | gammaproteobacteria  | oceanospirillales | hahellaceae          | hahella            | h. chejuensis       |
| XI      | 2      | bacteria | proteobacteria | gammaproteobacteria  | vibrionales       | vibrionaceae         | vibrio             | v. antiquarius      |
| XI      | 1      | bacteria | proteobacteria | gammaproteobacteria  | vibrionales       | vibrionaceae         | vibrio             | v. campbellii       |
| XI      | 1      | bacteria | proteobacteria | gammaproteobacteria  | vibrionales       | vibrionaceae         | vibrio             | v. cholerae         |
| XI      | 1      | bacteria | proteobacteria | gammaproteobacteria  | vibrionales       | vibrionaceae         | vibrio             | v. parahaemolyticus |
| XI      | 1      | bacteria | proteobacteria | gammaproteobacteria  | vibrionales       | vibrionaceae         | vibrio             | v. parahaemolyticus |

**Table S13.1.** (continuation)

| Cluster | Amount | Kingdom  | Phylum           | Class               | Order             | Family            | Genus            | Species             |
|---------|--------|----------|------------------|---------------------|-------------------|-------------------|------------------|---------------------|
| XI      | 2      | bacteria | proteobacteria   | gammaproteobacteria | vibrionales       | vibrionaceae      | vibrio           | v. vulnificus       |
| XI      | 1      | bacteria | proteobacteria   | gammaproteobacteria | vibrionales       | vibrionaceae      | vibrionales      | v. bacterium        |
| XI      | 1      | fungi    | ascomycota       | dothideomycetes     | pleosporales      | phaeosphaeriaceae | parastagonospora | p. nodorum          |
| XI      | 1      | fungi    | ascomycota       | dothideomycetes     | pleosporales      | pleosporaceae     | cochliobolus     | c. carbonum         |
| XI      | 1      | fungi    | ascomycota       | sordariomycetes     | hypocreales       | hypocreaceae      | trichoderma      | t. harzianum        |
| XI      | 1      | fungi    | ascomycota       | sordariomycetes     | hypocreales       | incertae sedis    | verticillium     | v. dahliae          |
| XI      | 1      | fungi    | ascomycota       | sordariomycetes     | hypocreales       | netriaceae        | fusarium         | f. oxysporum        |
| XI      | 1      | fungi    | zygomycota       | incertae sedis      | entomophthorales  | entomophthoraceae | zoophthora       | z. radicans         |
| XI      | 1      | fungi    | ascomycota       | leotiomycetes       | helotiales        | sclerotiniaceae   | sclerotinia      | s. sclerotiorum     |
| XI      | 1      | plantae  | heterokontophyta | oomycetes           | peronosporales    | pythiaceae        | pythophthora     | p. infestans        |
| XII     | 1      | animalia | annelida         | polychaeta          | capitellida       | arenicolidae      | arenicola        | a. marina           |
| XII     | 1      | animalia | arthropoda       | arachnida           | ixodida           | ixodidae          | ixodes           | i. scapularis       |
| XII     | 1      | animalia | arthropoda       | arachnida           | sarcoptiformes    | acaridae          | aleuroglyphus    | a. ovatus           |
| XII     | 2      | animalia | arthropoda       | arachnida           | sarcoptiformes    | glycyphagidae     | blomia           | b. tropicalis       |
| XII     | 1      | animalia | arthropoda       | chilopoda           | scolopendromorpha | scolopendridae    | scolopendra      | s. subspinipes      |
| XII     | 1      | animalia | arthropoda       | insecta             | blattodea         | blattidae         | periplaneta      | p. americana        |
| XII     | 1      | animalia | arthropoda       | insecta             | blattodea         | corydiidae        | eupolyphaga      | e. sinensis         |
| XII     | 2      | animalia | arthropoda       | insecta             | coleoptera        | bostrichidae      | rhizophortha     | r. dominica         |
| XII     | 1      | animalia | arthropoda       | insecta             | coleoptera        | chrysomelidae     | zabrotes         | z. subfasciatus     |
| XII     | 4      | animalia | arthropoda       | insecta             | coleoptera        | enebrionidae      | tenebrio         | t. molitor          |
| XII     | 6      | animalia | arthropoda       | insecta             | diptera           | cectdomyiidae     | mayetola         | m. destructor       |
| XII     | 1      | animalia | arthropoda       | insecta             | diptera           | ceratopogonidae   | culicoides       | c. sonorensis       |
| XII     | 23     | animalia | arthropoda       | insecta             | diptera           | culicidae         | aedes            | a. aegypti          |
| XII     | 19     | animalia | arthropoda       | insecta             | diptera           | culicidae         | anopheles        | a. gambiae          |
| XII     | 2      | animalia | arthropoda       | insecta             | diptera           | culicidae         | anopheles        | a. gambiae str      |
| XII     | 2      | animalia | arthropoda       | insecta             | diptera           | culicidae         | anopheles        | a. stephensi        |
| XII     | 1      | animalia | arthropoda       | insecta             | diptera           | culicidae         | culex            | c. pipiens          |
| XII     | 1      | animalia | arthropoda       | insecta             | diptera           | culicidae         | culex            | c. pipiens pallens  |
| XII     | 2      | animalia | arthropoda       | insecta             | diptera           | culicidae         | culex            | c. quinquefasciatus |
| XII     | 7      | animalia | arthropoda       | insecta             | diptera           | drosophilidae     | drosophila       | d. erecta           |
| XII     | 40     | animalia | arthropoda       | insecta             | diptera           | drosophilidae     | drosophila       | d. melanogaster     |
| XII     | 21     | animalia | arthropoda       | insecta             | diptera           | drosophilidae     | drosophila       | d. pseudoobscura    |
| XII     | 3      | animalia | arthropoda       | insecta             | diptera           | drosophilidae     | drosophila       | d. simulans         |
| XII     | 2      | animalia | arthropoda       | insecta             | diptera           | drosophilidae     | drosophila       | d. virilis          |
| XII     | 2      | animalia | arthropoda       | insecta             | diptera           | ioestridae        | hypoderma        | h. lineatum         |
| XII     | 2      | animalia | arthropoda       | insecta             | diptera           | muscidae          | stomoxys         | s. calcitrans       |
| XII     | 3      | animalia | arthropoda       | insecta             | diptera           | psychodidae       | lutzomyia        | l. longipalpis      |
| XII     | 2      | animalia | arthropoda       | insecta             | diptera           | psychodidae       | phlebotomus      | p. papatasi         |
| XII     | 1      | animalia | arthropoda       | insecta             | diptera           | sarcophagidae     | sarcophaga       | s. bullata          |
| XII     | 1      | animalia | arthropoda       | insecta             | diptera           | sarcophagidae     | sarcophaga       | s. peregrina        |
| XII     | 1      | animalia | arthropoda       | insecta             | hemiptera         | miridae           | lygus            | l. hesperus         |
| XII     | 4      | animalia | arthropoda       | insecta             | hemiptera         | miridae           | lygus            | l. lineolaris       |
| XII     | 1      | animalia | arthropoda       | insecta             | hymenoptera       | diprionidae       | neodiprion       | n. abietis          |
| XII     | 1      | animalia | arthropoda       | insecta             | hymenoptera       | diprionidae       | neodiprion       | n. lecontei         |

**Table S13.1.** (continuation)

| Cluster | Amount | Kingdom  | Phylum         | Class              | Order              | Family           | Genus            | Species           |
|---------|--------|----------|----------------|--------------------|--------------------|------------------|------------------|-------------------|
| XII     | 1      | animalia | arthropoda     | insecta            | hymenoptera        | diprionidae      | neodiprion       | n. sertifer       |
| XII     | 4      | animalia | arthropoda     | insecta            | lipidop            | noctuidae        | sesamia          | s. nonagrioides   |
| XII     | 5      | animalia | arthropoda     | insecta            | lepidoptera        | bombycidae       | bombyx           | b. mori           |
| XII     | 1      | animalia | arthropoda     | insecta            | lepidoptera        | crambidae        | ostrinia         | o. nubilalis      |
| XII     | 1      | animalia | arthropoda     | insecta            | lepidoptera        | lepidoptera      | agrotis          | a. ipsilon        |
| XII     | 1      | animalia | arthropoda     | insecta            | lepidoptera        | lepidoptera      | spodoptera       | s. litura         |
| XII     | 2      | animalia | arthropoda     | insecta            | lepidoptera        | sphingidae       | manduca          | m. sexta          |
| XII     | 2      | animalia | arthropoda     | insecta            | orthoptera         | gryllidae        | grylls           | g. firmus         |
| XII     | 1      | animalia | arthropoda     | insecta            | orthoptera         | gryllidae        | grylls           | g. pennsylvanicus |
| XII     | 1      | animalia | arthropoda     | insecta            | orthoptera         | gryllidae        | grylls           | g. veletis        |
| XII     | 2      | animalia | arthropoda     | insecta            | phthiraptera       | pediculidae      | pediculus        | p. humanus subsp  |
| XII     | 1      | animalia | arthropoda     | insecta            | siphonaptera       | pulicidae        | ctenophthalmides | c. felis          |
| XII     | 1      | animalia | arthropoda     | malacostraca       | decapoda           | litodidae        | paralithodes     | p. camtschaticus  |
| XII     | 2      | animalia | arthropoda     | malacostraca       | decapoda           | penaeidae        | penaeus          | p. monodon        |
| XII     | 1      | animalia | arthropoda     | malacostraca       | decapoda           | portunidae       | portunus         | p. pelagicus      |
| XII     | 1      | animalia | arthropoda     | malacostraca       | decapoda           | sesariidae       | chiromantes      | c. haematocheir   |
| XII     | 1      | animalia | arthropoda     | maxillopoda        | siphonostomatoida  | caligidae        | lepeophtheirus   | l. salmonis       |
| XII     | 1      | animalia | chordata       | actinopterygii     | beloniformes       | adrianchthyidae  | oryzias          | o. latipes        |
| XII     | 9      | animalia | chordata       | actinopterygii     | cypriniformes      | cyprinidae       | danio            | d. rerio          |
| XII     | 1      | animalia | chordata       | actinopterygii     | siluriformes       | ictaluridae      | ictalurus        | i. punctatus      |
| XII     | 4      | animalia | chordata       | actinopterygii     | tetraodontiformes  | tetraodontidae   | tetraodon        | t. nigroviridis   |
| XII     | 18     | animalia | chordata       | amphibia           | anura              | pipidae          | xenopodinae      | x. laevis         |
| XII     | 6      | animalia | chordata       | amphibia           | anura              | pipidae          | xenopodinae      | x. tropicalis     |
| XII     | 1      | animalia | chordata       | appendicularia     | copelata           | oikopleuridae    | oikopleura       | o. dioica         |
| XII     | 1      | animalia | chordata       | ascidiacea         | eurogona           | cionidae         | ciona            | c. intestinalis   |
| XII     | 1      | animalia | chordata       | aves               | galliformes        | phasianidae      | gallus           | g. gallus         |
| XII     | 1      | animalia | chordata       | cephalaspodomorphi | petromyzontiformes | petromyzontidae  | lethenteron      | l. japonica       |
| XII     | 2      | animalia | chordata       | leptocardii        | amphioxiformes     | branchiostomidae | branchiostoma    | b. belcheri       |
| XII     | 2      | animalia | chordata       | mammalia           | artiodactyla       | suidae           | sus              | s. scrofa         |
| XII     | 9      | animalia | chordata       | mammalia           | cetartiodactyla    | bovidae          | bos              | b. taurus         |
| XII     | 1      | animalia | chordata       | mammalia           | lagomorpha         | leporidae        | oryctolagus      | o. cuniculus      |
| XII     | 15     | animalia | chordata       | mammalia           | primates           | hominidae        | homo             | h. sapiens        |
| XII     | 5      | animalia | chordata       | mammalia           | primates           | hominidae        | pongo            | p. abelii         |
| XII     | 1      | animalia | chordata       | mammalia           | rodentia           | caviidae         | cavia            | c. porcellus      |
| XII     | 25     | animalia | chordata       | mammalia           | rodentia           | muridae          | mus              | m. musculus       |
| XII     | 10     | animalia | chordata       | mammalia           | rodentia           | muridae          | rattus           | r. norvegicus     |
| XII     | 1      | animalia | chordata       | reptilia           | squamata           | varanidae        | varanus          | v. acanthurus     |
| XII     | 1      | animalia | chordata       | reptilia           | squamata           | varanidae        | varanus          | v. mitchelli      |
| XII     | 12     | animalia | cnidaria       | anthozoa           | actiniaria         | edwardsiidae     | nematostella     | n. vectensis      |
| XII     | 2      | animalia | mollusca       | bivalvia           | pectinoida         | pectinidae       | azumapecten      | a. farreri        |
| XII     | 1      | animalia | mollusca       | gastropoda         |                    | planorbidae      | biopalmaria      | b. glabrata       |
| XII     | 3      | bacteria | actinobacteria | actinobacteria     | actinomycetales    | streptomyces     | streptomyces     | s. avermitilis    |
| XII     | 1      | bacteria | actinobacteria | actinobacteria     | actinomycetales    | streptomyces     | streptomyces     | s. coelicolor     |
| XII     | 1      | bacteria | actinobacteria | actinobacteria     | actinomycetales    | streptomyces     | streptomyces     | s. exfoliatus     |

**Table S13.1.** (continuation)

| Cluster | Amount | Kingdom  | Phylum         | Class               | Order           | Family             | Genus             | Species        |
|---------|--------|----------|----------------|---------------------|-----------------|--------------------|-------------------|----------------|
| XII     | 1      | bacteria | actinobacteria | actinobacteria      | actinomycetales | streptomycetaceae  | streptomycetes    | s. fradiae     |
| XII     | 1      | bacteria | actinobacteria | actinobacteria      | actinomycetales | streptomycetaceae  | streptomycetes    | s. glaucescens |
| XII     | 3      | bacteria | actinobacteria | actinobacteria      | actinomycetales | streptomycetaceae  | streptomycetes    | s. griseus     |
| XII     | 2      | bacteria | actinobacteria | actinobacteria      | actinomycetales | pseudonocardiaceae | saccharopolyspora | s. erythraea   |
| XII     | 1      | bacteria | proteobacteria | gammaproteobacteria | vibrionales     | vibrionaceae       | vibrio            | v. campbellii  |
| XII     | 1      | bacteria | proteobacteria | gammaproteobacteria | vibrionales     | vibrionaceae       | vibrio            | v. cholerae    |
| XII     | 1      | fungi    | ascomycota     | dothideomycetes     | pleosporales    | phaeosphaeriaceae  | parastagonospora  | p. nodorum     |
| XII     | 1      | fungi    | ascomycota     | eurotiomycetes      | eurotiales      | trichocomaceae     | emerella          | e. nidulans    |
| XII     | 3      | fungi    | ascomycota     | sordariomycetes     | hypocreates     | clavicipitaceae    | metarhizium       | m. anisopliae  |
| XII     | 1      | plantae  | chlorophyta    | prasinophyceae      | mamiellales     | bathycoccaceae     | ostreococcus      | o. lucimarinus |

One may observe that, although the larger clusters present mixtures even at the kingdom level, some interesting associations exist: all 32 trypsins in cluster II are from the lepidoptera order of the insecta class; all 38 in cluster V are from the mammalia class; all trypsins in clusters VI and VII, as well as all but one from cluster IV, are from the chordata phylum, although there are representatives from multiple classes. Almost all trypsins in cluster VII are from snake species. The trypsins in the remaining clusters, however, are a mixture.

This analysis shows that the trypsin subdivision is not phylogeny-related except for the aforementioned cases. The mixture in the larger clusters indicates a larger number of clusters would be required in order to create subdivisions for specific phylogenetic clades.

## References

1. Melo-Minardi RC, Bastard K, Artiguenave F. Identification of subfamily-specific sites based on active sites modeling and clustering. *Bioinformatics*. 2010 Dec;26(24):3075–3082.
